# Supplementary material for: Games between stakeholders and the payment for ecological services: evidence from the Wuxijiang River reservoir area in China
Source: PeerJ. 2018 Mar 8;6:e4475. doi: 10.7717/peerj.4475 (PMC5845578; doi:10.7717/peerj.4475)
Supplement: Supplemental Information 2 [file peerj-06-4475-s002.xlsx]

## Sheet: WTA data
Supplemental Files 2: Data gathered from survey for willingness to accept for ecological compensation of Wuxijiang river basin
No.	Gender	Age	Marital status	Householder’s education degree	Householder’s gender	Householder’s Age	Whether the householders born in the current village	Whether immigrated to the current village in the past 5 years	Family population	Family members with education above primary school	Whether located in the major villages	Land owned by the family	Forest land owned by the family	Crops and farmland ratio	Type of house	Family with modern toilets	Family available labor force	Family member with regular work	Total annual cash income	Family income from agriculture	Family income from regular work or business	Total annual non-farm cash income	Family annual total expenses	Total agricultural expenses	Total labor employment expenses	Total education expenses	Distance to the Wuxijiang River(meters)	Number of large-sized livestock	Number of poultry	Family total property value	Whether the householder accepted survey or not	WTA
1	1	67	2	67	1	3	0	0	6	2	1	1.7	20	0	1	0	0	0	4000	1500	2500	1	500	100	0	0	20	1	2	60000	1	2000
1	0	57	1	53	1	6	0	0	5	4	1	1.4	3	0	1	0	2	1	7000	7000	0	0	3500	1500	2000	0	5	1	2	40000	0	24000
1	0	56	1	58	1	5	1	0	4	4	1	1	0	0	1	0	4	1	6000	6000	0	0	1000	1000	0	0	20	0	0	40000	0	12000
1	0	53	1	54	1	8	1	0	4	4	1	1	10	0	1	0	4	1	27000	3000	24000	1	1000	1000	0	0	0	3	0	40000	0	24000
1	1	53	1	53	1	5	1	0	3	3	1	1	25	0	1	0	1	1	30000	0	30000	1	15000	0	0	35000	0	2	0	40000	1	3600
1	1	51	1	51	1	2	1	0	4	4	1	1	25	0	1	0	2	1	25000	10000	15000	1	26200	1000	200	25000	0	0	0	40000	1	6000
1	0	39	1	41	1	11	1	0	3	3	1	0	0.5	0	2	1	1	0	20000	0	20000	1	20000	0	0	5000	600	0	3	200000	0	10000
1	0	52	1	55	1	11	1	0	3	3	1	0	0	0	2	1	2	1	20000	0	20000	1	20000	0	0	0	10	0	0	200000	0	2400
1	1	68	1	68	1	5	1	0	3	3	1	1.7	0	0	0	0	1	1	30000	10000	20000	1	20000	0	0	0	1000	0	0	20000	1	1000
1	0	45	1	51	1	8	1	0	4	4	1	0.5	0	0	2	1	2	0	20000	0	20000	1	40000	0	0	40000	50	0	0	100000	0	1440
1	0	46	1	49	1	8	1	0	3	3	1	1	15	0	2	1	2	1	40000	10000	30000	1	30000	5000	0	0	1000	0	0	200000	0	4800
1	1	52	1	52	1	11	1	0	4	4	1	1	20	0	2	1	2	1	40000	10000	30000	1	30000	5000	0	0	50	0	0	300000	1	12000
1	1	56	1	56	1	9	1	0	3	3	1	1	20	0	2	1	1	1	20000	0	20000	1	15000	0	0	0	500	0	0	50000	1	30000
1	0	68	1	72	1	6	1	0	4	3	0	1	3	0	2	1	3	1	50000	0	50000	1	30000	0	0	0	2000	0	0	200000	0	4800
1	0	45	1	52	1	8	1	0	3	3	1	1.5	0	0	2	1	3	1	30000	0	30000	1	10000	0	0	0	50	0	0	220000	0	10000
1	1	28	1	28	1	14	1	0	5	4	1	0	0	0	2	1	3	0	50000	20000	30000	1	40000	10000	0	0	100	0	0	220000	1	18000
1	0	51	1	61	1	5	1	0	3	3	1	0	0	0	2	1	1	1	10000	0	10000	1	15000	0	0	0	500	0	0	50000	0	12000
1	1	40	1	40	1	8	1	0	5	3	1	10	10	0	2	1	3	1	60000	10000	50000	1	30000	10000	0	10000	50	0	0	220000	1	4800
1	1	57	1	57	1	0	1	0	3	2	1	0	0	0	2	1	2	1	10000	0	10000	1	10000	0	0	0	50	0	0	200000	1	4800
1	0	53	1	56	1	5	1	0	4	4	1	1	0	0	2	1	3	1	20000	0	20000	1	20000	0	0	0	30	0	0	210000	0	3600
1	1	52	1	52	1	11	1	0	3	3	1	0	0	0	2	1	3	1	50000	0	50000	1	30000	0	0	0	20	0	0	220000	1	1200
1	1	50	1	50	1	9	1	0	5	5	0	1.5	4	0	2	1	1	1	20000	0	20000	1	20000	20000	0	40000	50	0	0	200000	1	0
1	1	51	1	51	1	8	1	0	3	3	1	2	0	0	0	0	1	0	20000	0	20000	1	20000	0	0	10000	100	0	0	20000	1	12000
1	0	40	1	49	1	8	1	1	3	3	1	0.25	0.5	0	2	1	1	1	25000	0	25000	1	20000	0	0	5000	5000	0	0	200000	0	0
1	0	35	1	40	1	8	1	0	3	3	1	0	0	0	2	1	1	1	40000	0	40000	1	20000	0	0	3000	100	0	0	220000	0	0
1	1	39	1	39	1	8	1	0	4	1	1	1	0	0	2	1	2	1	50000	0	50000	1	40000	0	0	5000	30	0	0	220000	1	0
1	0	48	1	54	1	8	1	0	4	3	1	1	0	0	2	1	1	1	30000	20000	10000	1	10000	1000	1000	0	100	0	0	200000	0	0
1	0	67	1	41	1	8	1	1	5	4	1	1.8	0	0	2	1	2	1	50000	3000	47000	1	15000	5000	2000	1000	100	0	0	200000	0	0
1	0	43	1	43	0	5	1	0	1	1	1	0	0	0	1	0	1	0	20000	0	20000	1	10000	0	0	0	100	0	0	40000	1	0
1	1	45	1	45	1	11	1	0	3	3	1	0.25	0.5	0	0	0	1	0	16000	4000	12000	1	15000	6000	3000	2000	100	0	2	20000	1	0
1	1	50	1	50	1	5	1	0	4	2	1	2	1	0	1	0	2	1	3000	3000	0	0	10000	1500	0	4000	0	0	0	50000	1	3000
1	0	35	1	35	1	8	1	0	4	2	0	1	20	0	2	1	2	1	44000	8000	36000	1	20000	2500	0	8000	50	0	5	200000	0	30000
1	1	56	1	56	1	5	0	0	4	4	1	1.3	0	0	1	0	2	1	15000	10000	5000	1	2000	1000	1000	0	10	0	0	50000	1	43200
1	1	44	1	44	1	7	1	0	4	4	0	2	4	0	2	1	3	0	30000	3000	27000	1	15000	1000	0	500	0	1	2	200000	1	30000
1	0	63	1	70	1	5	1	0	2	1	0	3	30	0	0	0	2	0	6000	6000	0	0	15000	2000	0	20000	0	0	0	30000	0	36000
1	1	63	1	63	1	7	1	0	5	5	1	4	4	0	1	0	3	1	20000	0	20000	1	15000	0	0	0	0	0	3	50000	1	12000
1	0	52	2	52	0	7	0	0	2	2	1	0	0	0	1	0	1	1	27400	1000	26400	1	10000	0	0	6000	0	0	10	50000	1	36000
1	1	45	1	45	1	8	1	0	3	3	1	0.5	0	0	1	0	1	0	20000	0	20000	1	15000	0	0	0	0	0	0	50000	1	6000
1	1	69	1	69	1	7	0	0	5	5	1	1.5	30	0	1	0	5	1	50000	0	50000	1	40000	0	0	0	0	0	0	50000	1	43200
1	1	55	1	55	1	11	0	0	3	3	1	0.89	15	0	2	1	2	1	15000	0	15000	1	50000	3000	2400	0	0	10	0	200000	1	6000
1	0	61	1	64	1	6	1	0	2	2	1	2	20	0	2	1	2	1	20000	0	20000	1	12000	0	0	0	200	0	3	200000	0	10000
1	0	52	1	55	1	12	1	0	5	5	0	2.5	20	0	2	1	1	1	10000	0	10000	1	10000	0	0	5000	200	0	0	500000	0	25000
1	1	46	1	46	1	1	1	0	5	5	1	2	6	0	1	0	1	0	20000	0	20000	1	17000	0	0	10000	1000	0	0	30000	1	30000
1	1	64	1	64	1	4	1	0	2	1	0	2	3	0	1	0	1	0	20000	0	20000	1	20000	0	1	0	200	0	0	100000	1	0
1	0	75	1	76	1	3	1	0	3	2	0	2	4	0	1	0	2	0	30000	0	30000	1	20000	0	0	0	20	0	0	50000	0	6000
1	0	32	1	55	1	11	1	0	3	2	1	1	3	0	1	0	3	1	10000	0	10000	1	10000	0	0	0	3000	0	4	100000	0	1200
1	0	63	1	70	1	6	1	0	2	1	0	20	5	0	1	0	1	0	12000	0	12000	1	10000	0	0	0	1800	0	0	100000	0	1000
1	1	72	1	72	1	0	1	0	2	0	1	1	10	10	1	0	0	1	10000	0	10000	1	30000	0	0	0	200	0	3	50000	1	12000
1	1	53	0	53	1	0	1	0	1	0	1	0.1	2	0	0	0	1	1	2000	0	2000	1	3000	0	0	0	400	0	0	30000	1	24000
1	1	86	1	86	1	0	1	0	2	0	1	1	15	10	1	0	0	0	10000	0	10000	1	8000	0	0	0	500	0	4	50000	1	10800
1	0	72	1	74	1	0	1	0	4	2	1	2	12	10	2	1	2	1	40000	10000	30000	1	30000	5000	0	0	20	0	0	200000	0	4000
1	0	55	1	59	1	5	1	0	2	2	1	0	0	0	1	0	2	1	5000	0	5000	1	10000	0	0	0	90	0	0	50000	0	4800
1	1	45	1	45	1	8	1	0	3	3	1	0.5	0	0	2	1	1	0	10000	1000	9000	1	27000	100	0	4500	1000	0	5	200000	1	6000
1	1	57	1	57	1	5	1	0	3	1	1	5	0	20	2	1	0	0	5000	0	5000	1	4000	3000	0	0	10	0	0	200000	1	20000
1	0	27	1	53	1	8	1	0	5	4	0	0	0	0	1	0	2	1	35000	10000	25000	1	15000	0	0	20000	10	0	0	50000	0	0
1	0	50	1	53	1	11	1	0	4	4	1	0	0	0	1	0	1	1	10000	0	10000	1	7000	0	0	2000	10	0	0	50000	0	1200
1	1	60	1	60	1	0	1	0	4	2	1	5	0	0	2	1	2	1	5000	5000	0	0	3000	0	0	0	10	0	0	200000	1	2500
1	1	63	1	63	1	5	1	0	2	2	1	5	0	0	2	1	2	1	5000	0	5000	1	4000	0	0	0	15	0	0	200000	1	500
1	0	58	1	63	1	0	1	0	2	0	1	2	1	33	2	1	0	0	10000	2000	8000	1	10000	2000	0	0	50	0	10	200000	0	0
1	0	54	1	58	1	6	1	0	3	3	1	0	0.5	10	0	0	1	0	4500	2000	2500	1	15000	0	540	0	100	0	0	9000	0	0
1	0	61	1	69	1	8	1	0	3	3	1	2	0.5	10	2	1	1	0	36000	0	36000	1	20000	300	0	0	1500	0	0	300000	0	0
1	0	61	1	63	1	3	0	0	7	4	1	1	10	80	2	1	2	0	40000	1000	39000	1	20000	0	0	2000	2000	0	2	200000	0	18000
1	1	60	1	60	1	8	1	0	5	5	1	2	4	20	0	0	3	1	75000	0	75000	1	30000	2500	0	0	10	0	0	30000	1	18000
1	1	52	2	52	1	5	1	0	3	2	1	1	0	0	1	0	1	0	10000	250	9750	1	20000	0	0	0	700	0	0	50000	1	12000
1	1	54	1	54	1	5	1	0	4	2	1	1	5	0	1	0	1	0	10000	0	10000	1	25000	0	0	8000	700	0	0	50000	1	12000
1	1	55	1	55	1	4	1	0	5	1	1	2	10	0	2	1	2	0	20000	0	20000	1	10000	0	0	30000	700	0	0	200000	1	24000
1	1	60	1	54	0	0	0	0	5	2	1	2	3	40	1	0	2	0	10000	1000	9000	1	10000	0	0	0	500	0	2	50000	0	0
1	1	68	2	68	1	8	1	0	3	3	1	1.5	6	0	2	1	0	0	40000	0	40000	1	24000	2000	0	0	1000	0	0	200000	1	4800
1	1	49	1	49	1	5	1	0	3	3	1	6	10	60	0	0	3	1	40000	1000	39000	1	30000	0	0	0	2500	0	2	100000	1	3600
1	1	50	1	50	1	9	1	0	4	4	1	4	20	0	1	0	3	1	100000	10000	90000	1	50000	3000	900	10000	50	0	0	50000	1	2400
1	0	61	1	63	1	5	1	0	5	5	1	1.5	3	0	2	1	2	0	44000	0	44000	1	60000	0	0	0	2000	0	2	50000	0	3600
1	1	51	1	51	1	5	1	0	4	4	1	1.2	0	30	2	1	1	0	34000	0	34000	1	25000	0	0	0	70	0	0	60000	1	12000
1	0	60	1	60	0	8	1	1	7	6	1	2.46	14.5	0	2	1	3	1	40000	5000	35000	1	20000	800	900	6000	2500	0	0	500000	1	0
1	1	42	0	42	1	5	0	1	2	1	1	0.5	0	0	0	0	1	0	30000	0	30000	0	10000	0	0	0	1000	0	0	10000	0	0
1	1	78	1	78	1	0	0	0	6	4	0	1	90	0	2	1	1	1	30000	2000	28000	1	20000	0	0	1000	50	0	2	600000	1	20000
1	0	69	2	95	0	0	1	0	7	6	1	0	1	0	2	1	1	1	10000	0	10000	1	10000	0	0	6000	2500	0	0	200000	0	20000
1	1	68	1	68	1	8	1	0	5	4	1	1	10	50	1	0	2	1	30000	0	30000	1	10000	500	0	2500	400	0	6	100000	1	7200
1	1	49	1	49	1	8	1	0	3	3	1	1	1	0	0	0	3	1	30000	0	30000	1	20000	0	0	0	300	0	0	150000	1	36000
1	1	59	1	59	1	5	0	0	6	3	1	1.3	1	95	2	1	3	0	50000	10000	40000	1	40000	2000	0	20000	800	0	2	100000	1	12000
1	1	49	1	49	1	5	1	0	4	3	1	0.4	2	50	0	0	1	0	15000	0	15000	1	15000	0	0	3000	1000	0	0	20000	0	21600
1	0	49	1	49	1	8	1	0	9	6	1	1	6	0	2	1	4	0	44000	4000	40000	1	24000	0	0	3600	2000	0	4	50000	1	14400
1	0	58	2	58	0	2	1	0	2	2	1	1	0.5	0	0	0	1	1	12000	0	12000	1	20000	0	0	0	100	0	0	100000	1	50400
1	0	68	1	68	0	0	0	1	7	3	1	0	7	20	1	0	2	1	30000	0	30000	1	20000	0	0	30000	100	0	0	60000	1	400
1	0	79	2	56	1	5	1	0	6	4	1	0	3	10	1	0	4	1	30000	0	30000	1	20000	0	0	10000	100	0	0	150000	0	10800
1	0	52	1	57	1	5	1	0	3	3	1	2	10	100	2	1	3	0	30000	0	30000	1	40000	3000	0	0	500	0	0	200000	0	28800
1	0	62	1	73	1	3	1	0	2	1	1	1	0	10	0	0	1	0	3000	0	3000	1	2000	0	0	0	1000	0	0	10000	0	36000
1	1	50	1	50	1	5	1	0	4	2	1	2	0	100	2	1	2	0	30000	20000	10000	1	20000	3000	1000	10000	500	0	0	100000	1	36000
1	0	71	1	78	1	5	1	0	7	6	1	0	0	10	1	0	3	1	40000	0	40000	1	60000	0	0	50000	700	0	0	40000	0	6000
1	0	38	1	42	1	8	1	0	4	3	1	0	5	10	2	1	2	0	20000	0	20000	1	15000	0	0	5000	1000	0	0	100000	0	3000
1	1	61	1	61	1	8	1	0	5	0	1	2	0	0	0	0	2	0	20000	2000	18000	1	30000	2000	0	0	500	0	0	300000	1	2000
1	0	33	1	34	1	8	1	0	5	4	1	1	5	0	1	0	2	0	10000	0	10000	1	20000	0	0	3000	1000	0	5	100000	0	30000
1	1	45	1	45	1	9	1	0	3	3	0	1.6	16	60	0	0	2	0	40000	10000	30000	1	20000	5000	0	50000	1000	0	3	150000	1	4800
1	1	57	1	57	1	8	1	0	3	3	1	1.2	10	0	2	1	2	1	6000	0	6000	1	20000	0	0	0	1000	0	0	20000	1	0
1	1	45	1	45	1	9	1	0	3	3	1	2	0	0	2	1	1	1	5000	5000	0	0	10000	500	0	8000	1000	0	0	600000	1	0
1	0	48	1	56	1	9	1	0	5	4	1	8.63	0	0	0	0	2	0	34000	300	33700	1	10000	0	0	3600	1000	0	10	20000	0	0
1	0	52	1	52	1	2	1	0	4	4	1	1.5	1	0	1	0	3	1	32000	0	32000	1	25000	0	0	1000	1000	0	0	50000	0	0
1	1	86	1	86	1	6	1	0	6	6	1	0	0	0	0	0	4	1	40000	0	40000	1	10000	0	0	2000	2000	0	2	50000	1	0
1	1	72	1	63	0	0	1	0	2	2	1	1	3	0	2	1	2	0	1000	0	1000	1	10000	0	0	0	100	0	12	200000	0	0
1	0	45	1	52	1	7	1	0	8	3	1	2	1	90	0	0	4	1	45000	5000	40000	1	40000	2000	0	20000	800	0	3	80000	0	0
1	0	57	1	57	0	5	1	0	5	4	1	1.3	1	5	2	1	3	0	40650	0	40650	1	40000	0	0	20000	1000	0	0	150000	1	0
1	0	70	1	70	0	5	1	0	9	9	1	2	5	0	2	1	4	0	12000	0	12000	1	10000	0	0	0	4000	0	2	100000	1	0
1	1	62	2	62	1	6	1	0	5	4	1	1	15	15	2	1	3	1	30000	1500	28500	1	30000	0	0	0	400	0	2	150000	1	0
2	0	54	1	58	1	8	1	0	4	4	1	0	0	0	2	0	4	1	30000	0	30000	0	30000	0	0	0	0	0	0	200000	1	0
2	1	63	1	63	1	8	0	0	5	3	0	0	0	0	2	0	4	1	30000	0	30000	1	30000	0	0	0	0	0	6	200000	1	0
2	1	40	1	40	1	8	0	0	4	3	0	0	7.8	0	2	0	1	1	60000	0	60000	1	30000	0	0	2000	0	0	5	200000	0	0
2	1	55	1	55	1	5	0	0	5	3	0	5	0	50	2	1	3	1	70000	0	70000	1	50000	0	0	20000	0	0	0	200000	0	0
2	0	32	1	32	0	11	1	0	5	2	1	0	0	0	2	0	2	1	30000	0	30000	1	30000	0	0	2000	0	0	0	200000	0	0
2	0	60	1	55	1	1	1	0	2	0	1	0	2	100	1	0	2	0	25000	0	25000	1	20000	0	0	0	20	0	0	45000	0	0
2	0	50	1	51	1	12	1	0	3	3	1	1.5	0	100	2	1	3	1	30000	0	30000	1	20000	0	0	0	50	0	0	200000	0	0
2	0	82	1	86	1	0	1	0	14	6	1	1.5	0	100	1	0	0	1	0	0	0	1	0	0	0	0	20	0	2	50000	0	0
2	1	47	0	43	1	8	1	0	6	6	1	4	15	40	2	1	2	1	30000	0	30000	1	10000	0	0	3000	150	0	5	200000	1	0
2	0	53	1	53	1	8	1	0	4	3	1	1	7.5	0	2	0	2	1	10000	0	10000	1	10000	0	0	140000	50	0	0	200000	0	0
2	0	64	1	69	1	5	1	0	6	4	1	2	12	14	0	0	2	1	32500	2500	30000	1	30000	1000	0	30000	100	0	2	150000	0	0
2	0	51	1	52	1	11	1	0	4	4	1	2	18	10	2	1	2	1	60000	5000	55000	1	25000	1200	0	0	200	0	0	250000	0	7000
2	0	60	1	60	1	8	1	0	5	3	1	4	60	10	2	1	3	1	60000	8000	52000	1	12000	1000	500	12000	200	0	0	210000	0	4000
2	1	32	1	62	1	5	1	0	4	4	1	2.5	12	100	2	0	1	1	50000	10000	40000	1	30000	300	0	0	200	0	6	220000	0	6000
2	1	79	1	79	1	0	1	0	6	3	1	2	5	28	1	1	3	1	30000	0	30000	1	15000	0	0	20000	250	0	0	150000	1	1000
2	0	31	1	58	1	6	1	0	5	4	1	2	1	0	2	1	2	1	100000	0	100000	0	80000	0	0	0	100	0	10	500000	0	2500
2	1	29	0	56	1	8	1	0	4	4	1	1	0	0	2	1	2	0	10000	0	10000	0	10000	0	0	10000	5	0	5	100000	0	20000
2	0	46	1	51	1	8	1	0	3	3	1	1	0	0	1	1	2	1	20000	0	20000	0	20000	0	0	150000	20	0	0	200000	1	2000
2	0	47	1	55	1	8	1	0	4	4	1	2	0	100	2	1	3	1	10000	0	10000	1	10000	2000	0	0	0	0	0	200000	0	1000
2	1	47	1	47	1	2	1	0	3	3	1	1	0	0	2	0	3	1	60000	0	60000	1	50000	0	0	30000	0	0	0	100000	1	0
2	0	52	1	60	1	0	1	0	3	2	1	2	0	100	2	0	1	1	12000	3000	9000	1	10000	3500	4000	0	20	0	0	300000	1	0
2	1	66	1	66	1	1	1	0	4	2	1	2.5	1.6	0	2	0	3	1	20000	5000	15000	1	18000	1000	0	0	0	0	0	200000	1	1500
2	1	59	1	59	1	6	1	0	4	4	1	0.26	2	0	0	0	0	0	5000	5000	0	0	5000	5000	0	0	5	0	0	300000	1	1200
2	0	57	1	57	1	0	1	0	6	2	1	1	1	0	1	1	1	0	24000	0	24000	0	24000	0	0	0	0	0	0	50000	1	0
2	0	77	1	81	1	6	1	0	2	0	1	0	0	0	1	0	0	0	48000	0	48000	0	30000	0	0	0	0	0	0	50000	0	0
2	0	62	1	70	1	6	1	0	6	2	1	0	0	0	0	1	2	1	20000	0	20000	1	15000	0	0	0	0	0	0	20000	0	12000
2	0	52	1	55	1	6	1	0	4	4	1	1	1	0	0	0	3	1	50000	0	50000	1	12000	0	0	30000	0	0	0	40000	0	0
2	1	45	1	45	1	5	1	0	4	3	1	1.5	0	100	1	1	2	1	30000	0	30000	1	30000	0	0	30000	0	0	0	50000	1	0
2	0	40	1	43	1	9	1	0	4	4	1	0	0	100	1	1	2	1	50000	0	50000	1	50000	0	0	150000	0	0	0	50000	0	2400
2	1	42	1	42	1	11	1	0	5	5	1	4	10	100	2	1	2	1	50000	0	50000	1	50000	0	0	40000	0	0	0	100000	1	15000
2	1	51	1	51	1	5	1	0	3	3	1	1	40	100	2	1	0	1	60000	30000	30000	1	60000	3000	0	0	0	0	0	300000	1	0
2	1	45	1	45	1	8	1	0	3	3	1	1	1	0	2	1	1	0	20000	0	20000	0	20000	2000	0	10000	15	0	3	300000	1	0
2	1	74	1	74	1	0	1	0	2	0	1	1	0	0	2	1	0	0	3000	3000	0	0	3000	100	0	0	50	1	20	200000	1	2000
2	0	62	1	70	1	6	1	0	12	10	1	0	0	0	2	1	3	1	20000	0	20000	1	12000	0	0	7200	20	0	5	700000	0	450
2	0	46	1	49	1	9	1	0	3	3	1	0	0	0	2	1	1	1	30000	0	30000	1	20000	0	0	0	0	0	6	220000	0	450
2	0	51	1	52	1	12	1	0	4	4	1	1	0	0	2	1	3	1	61000	0	61000	1	10000	0	0	150000	10	0	0	350000	0	0
2	1	60	1	60	1	5	1	0	6	2	1	0.5	0	0	2	1	2	1	15000	100	15000	1	4000	0	0	0	150	0	0	200000	1	400
2	0	54	1	55	1	1	1	0	3	3	1	1	0	0	2	1	1	1	10000	0	10000	1	20000	200	0	3000	200	0	8	30000	0	2000
2	0	50	1	54	1	5	1	0	5	5	1	1	0	0	1	0	1	0	30000	3000	27000	1	20000	500	0	110000	250	0	2	40000	0	1500
2	0	53	1	59	1	5	1	0	3	3	0	1	0	0	2	1	2	1	20000	0	20000	1	15000	0	0	0	0	0	35	210000	0	0
2	0	53	1	57	1	5	1	0	5	5	1	1	0	0	2	1	5	1	100000	0	100000	1	90000	0	0	0	0	0	4	450000	0	0
2	0	40	1	46	1	8	1	0	4	4	1	1	0	0	2	1	2	1	45000	0	45000	1	50000	0	0	0	0	0	60	800000	0	0
2	0	67	1	68	1	6	1	1	6	2	1	1.5	1	0	1	0	0	0	15000	0	15000	1	1000	0	0	0	0	0	0	40000	0	0
2	0	47	1	51	1	11	1	0	3	3	0	1	0.7	0	2	1	3	1	200000	0	200000	1	70000	0	0	0	0	0	70	300000	0	0
2	0	38	1	45	1	8	1	0	4	3	1	0	0	0	2	1	2	1	30000	0	30000	1	10000	0	0	0	0	0	0	200000	0	0
2	0	43	1	43	0	5	1	0	3	3	0	0	20	0	2	1	2	1	30000	12000	18000	1	20000	6400	6400	0	0	0	8	220000	1	0
2	1	58	1	58	1	0	1	0	5	2	1	0	0	0	2	1	2	1	10000	0	10000	1	10000	0	0	0	0	0	0	210000	1	0
2	0	53	1	58	1	5	1	0	4	4	1	0	1	0	2	1	2	0	30000	0	30000	1	30000	0	0	100	10	0	0	150000	0	1200
2	0	45	1	56	1	0	1	0	4	2	0	1	1	0	0	0	3	1	50000	30000	20000	1	30000	0	0	20000	50	0	0	100000	0	2000
2	0	40	1	42	1	8	1	0	4	4	1	0.3	1	0	2	1	2	1	300000	0	300000	1	130000	0	50000	50000	5000	0	100	300000	0	0
2	0	69	1	77	1	0	1	0	9	5	1	0.5	0.5	100	1	0	2	1	15000	0	15000	1	72000	0	0	5000	300	0	8	600000	0	0
2	0	60	1	63	1	0	1	0	5	0	1	0.5	0.5	0	2	1	2	1	20000	0	20000	1	10000	0	0	0	5	0	3	200000	0	0
2	0	54	1	63	1	8	1	0	5	4	1	0.25	0	0	2	1	1	1	60000	0	60000	1	60000	0	0	0	20	0	8	200000	0	0
2	0	66	1	66	0	8	1	0	3	2	1	1	3.5	0	2	1	1	1	60000	0	60000	1	60000	0	0	0	300	0	0	200000	1	0
2	0	58	1	78	1	0	1	0	5	2	1	1	0.5	0	2	1	2	1	70000	0	70000	1	40000	0	0	5000	10	0	5	220000	0	0
2	0	51	1	51	1	8	1	0	3	3	1	1	30	0	2	1	3	1	112000	0	112000	1	50000	0	0	0	50	0	3	250000	0	0
2	1	61	1	61	1	0	1	0	3	1	1	1	1.5	0	1	0	2	1	42000	0	42000	1	2600	0	0	0	200	0	5	60000	1	0
2	1	88	1	88	1	1	1	0	17	8	1	3	10	0	1	0	14	1	500000	0	500000	1	350000	0	0	20000	30	0	6	60000	1	0
2	0	48	1	48	1	8	1	0	3	3	1	1	5	0	2	1	2	1	50000	0	50000	1	30000	0	0	0	20	0	10	220000	0	0
2	0	76	1	76	0	0	1	0	2	0	1	0.5	0.5	0	0	0	0	0	750	750	0	0	0	0	0	0	0	0	9	20000	1	0
2	1	76	1	76	1	5	1	0	5	3	1	1	1	0	2	1	1	1	20000	0	20000	1	1500	0	0	10000	0	0	0	200000	1	0
2	0	58	1	78	1	0	1	0	4	4	1	1	0.5	0	1	0	1	1	60000	0	60000	1	15000	0	0	0	0	0	4	60000	0	0
2	0	31	1	39	1	5	1	0	6	5	1	3.5	0	0	2	1	1	1	43600	10000	33600	1	43600	1500	0	20400	100	0	4	150000	0	2000
2	1	34	1	64	1	5	1	0	6	4	1	2.5	0	0	2	1	2	1	220000	20000	200000	1	170000	1000	0	90000	200	0	0	220000	1	2000
2	0	44	1	54	1	8	1	0	4	3	1	4	13	0	2	1	2	1	42600	5000	37600	1	24600	600	0	84400	150	0	2	220000	0	5000
2	0	65	1	73	1	11	1	0	2	1	1	1	0	0	2	1	0	0	10000	10000	0	1	3000	0	0	0	50	0	0	210000	0	0
2	1	56	1	56	1	5	1	0	4	4	0	1.5	10	0	2	1	3	1	146000	0	146000	1	30000	0	0	0	20	0	0	220000	1	0
2	1	82	2	82	1	5	0	0	5	5	0	0	0	0	2	1	2	1	108000	0	108000	1	40000	0	0	6000	20	0	0	220000	1	0
2	0	25	1	53	1	6	1	0	8	7	1	0	0	0	2	1	4	1	50000	0	50000	1	40000	0	0	0	0	0	18	200000	0	4000
2	1	68	1	68	1	6	1	0	2	1	0	0	0	0	2	1	2	0	3000	3000	0	0	6000	0	0	0	20	0	2	200000	1	0
2	1	60	1	60	1	2	1	0	5	3	1	3	30	0	0	0	2	0	30000	0	30000	1	30000	0	0	0	10	0	1	10000	1	5000
2	0	47	1	52	1	8	1	0	5	4	1	0	0	0	2	1	3	0	50000	0	50000	1	20000	0	0	4000	10	0	0	200000	0	24000
2	1	64	1	64	1	11	1	0	8	8	1	1	3	0	2	1	2	1	600000	2000	598000	1	200000	0	200	40000	10	0	0	200000	1	38400
2	0	80	1	80	1	5	1	0	6	4	1	0	2	0	2	1	1	0	30000	0	30000	1	30000	0	0	0	10	0	0	150000	0	1200
2	1	58	1	58	1	6	1	0	5	5	0	0	4.5	0	1	0	3	0	20000	0	20000	1	15000	0	0	0	0	0	10	40000	1	0
2	0	50	1	62	1	6	1	0	5	3	1	0.5	0	0	2	1	3	1	20000	0	20000	1	15000	0	0	0	0	0	0	200000	0	0
2	0	57	1	57	1	0	1	0	6	3	1	1	1	0	2	1	1	1	60000	7000	53000	1	60000	2000	0	4000	0	0	0	220000	0	0
2	0	49	1	57	1	5	1	0	3	2	1	1	0	0	2	1	2	1	10000	0	10000	1	8000	1000	0	30000	0	0	0	200000	0	0
2	1	61	1	61	1	8	1	0	4	4	0	0	0	0	2	1	2	1	10000	5000	5000	1	10000	720	0	0	0	0	0	200000	1	0
2	1	31	2	61	1	1	1	0	5	0	1	1	0	0	2	1	0	1	400000	0	400000	1	150000	0	40000	0	0	0	0	210000	1	0
2	1	52	1	52	1	11	1	0	3	1	1	1	5	0	2	1	1	1	40000	4000	36000	1	30000	500	0	0	0	0	4	150000	1	0
2	0	53	1	57	1	6	1	0	4	4	1	1	7	0	2	1	1	0	20000	0	20000	1	15000	5000	0	0	10	0	0	200000	0	400
2	0	14	1	74	1	8	1	0	6	3	1	0	1	0	2	1	2	0	38000	0	38000	1	30000	0	0	15000	10	0	8	60000	0	3000
2	1	55	1	55	1	15	1	0	5	5	1	2	100	0	2	1	0	0	10000	10000	0	0	10000	2000	0	0	20	0	1	200000	1	0
2	1	45	1	45	1	8	1	0	4	4	1	0	4.5	0	2	1	3	1	12000	0	12000	1	20000	0	0	4000	0	0	0	200000	1	0
2	1	68	1	68	1	0	0	0	6	3	1	1.25	1	0	2	1	1	1	40000	0	40000	1	15000	0	0	3000	0	0	5	200000	1	0
2	0	77	2	77	0	0	1	0	2	1	0	0	0	0	2	1	0	0	14400	0	14400	1	8000	0	0	0	0	0	0	200000	1	0
2	0	58	1	68	1	0	1	0	8	0	0	3.5	100	0	2	1	4	0	20000	0	20000	1	10000	0	0	0	0	0	2	200000	0	0
2	1	45	1	45	1	9	1	0	3	3	0	0	1	0	1	0	3	1	20000	0	20000	1	10000	0	0	0	20	0	0	60000	1	0
2	0	28	1	50	1	6	1	0	5	3	1	0	0	0	2	1	2	1	70000	0	70000	1	50000	0	0	0	20	0	0	200000	0	0
2	1	67	1	67	1	0	1	0	5	2	1	1.1	4.5	0	2	1	1	1	40000	4000	36000	1	10000	1000	0	16000	15	0	0	200000	1	1000
2	1	53	1	53	1	0	1	0	3	3	1	41.1	4	0	2	1	2	1	24000	0	24000	1	10000	0	0	0	0	0	30	200000	1	0
3	1	42	1	42	1	8	1	0	3	3	1	1.3	3.5	0	2	1	1	1	30000	10000	20000	1	25000	3000	0	50000	20	0	9	600000	1	2000
3	1	40	0	64	0	5	1	0	2	2	1	1	5	0	1	0	1	1	10000	5000	10000	1	10000	1000	0	0	50	1	0	100000	0	5000
3	1	45	1	45	1	8	1	0	3	3	1	1	50	0	1	0	1	1	30000	1000	29000	1	20000	200	200	80000	5	0	0	50000	1	1000
3	1	52	2	52	1	1	1	0	3	1	1	1.3	7	10	1	0	0	0	3000	3000	0	0	10000	0	0	52000	20	0	0	40000	1	800
3	1	44	1	44	1	8	1	0	4	2	1	1	5	0	1	0	0	0	13000	2000	11000	1	13000	0	0	5000	5	0	0	100000	1	700
3	1	64	1	64	1	5	1	0	4	3	1	4.1	45	0	1	1	2	1	65000	0	65000	1	30000	0	0	0	0	0	8	40000	1	0
3	1	73	2	73	1	6	1	0	1	1	1	0.3	1	0	0	0	0	0	3000	0	3000	1	1000	0	0	0	0	0	4	20000	1	0
3	1	60	2	60	1	6	1	0	3	2	1	1	10	0	0	0	0	0	20000	0	20000	1	10000	0	0	0	0	0	9	20000	1	0
3	1	53	1	75	1	0	1	0	2	1	1	0	0	0	1	1	2	0	30000	0	30000	1	12000	0	0	0	0	0	0	40000	1	0
3	1	44	1	53	1	0	0	0	3	1	1	1	25	0	1	1	1	1	10000	0	10000	1	30000	0	0	20000	0	0	10	40000	1	0
3	1	46	1	44	1	10	0	0	5	4	1	0	0	0	2	1	1	1	120000	0	120000	1	72000	0	0	7200	0	0	5	200000	1	0
3	0	70	1	52	1	6	1	0	3	3	1	0.2	2.5	0	0	0	0	1	30000	0	30000	1	12000	0	0	0	0	0	8	20000	0	0
3	1	65	2	70	1	6	0	0	1	1	1	0	0	0	1	0	0	0	12000	0	12000	1	5000	0	0	0	0	0	0	40000	1	0
3	1	50	1	65	1	2	1	0	2	1	1	0	100	0	0	1	0	0	0	0	0	0	10000	2000	0	0	0	0	0	10000	1	1000
3	1	69	1	50	1	8	1	0	5	3	1	2	20	100	1	1	3	0	10000	10000	0	0	10000	0	0	0	0	0	0	40000	1	0
3	1	55	1	69	1	0	1	0	5	2	1	2	10	100	1	1	0	0	30000	2500	27500	1	40000	0	0	0	20	0	2	40000	1	2500
3	1	69	2	55	1	6	1	0	1	1	1	4.5	4.5	0	2	1	1	1	36000	0	36000	1	18000	1000	0	0	10	0	0	210000	1	500
3	1	79	1	69	1	1	1	0	11	5	1	0.5	2.5	0	2	0	6	1	40000	40000	0	0	30000	0	0	25000	45	0	30	180000	1	3350
3	1	62	2	79	1	4	1	0	12	3	1	2	20	0	2	1	8	1	72000	0	72000	1	60000	0	0	0	40	0	0	210000	1	1500
3	0	65	1	70	1	0	1	0	6	2	1	1	0	0	2	1	5	1	36000	0	36000	1	15000	0	0	0	20	0	0	200000	0	0
3	1	65	1	65	1	6	1	0	4	3	1	1	100	0	2	1	2	1	600000	200	599800	1	10200	0	0	0	10	0	21	2200000	1	28800
3	1	55	1	65	1	6	1	0	9	6	1	1	100	0	2	1	2	1	72000	0	72000	1	10000	0	0	0	20	0	0	200000	1	750
3	1	38	1	55	1	12	1	0	3	3	1	1.2	0	0	2	1	3	1	400000	0	400000	1	150000	0	0	0	30	0	0	200000	1	0
3	0	67	1	42	1	9	1	0	3	2	1	0.3	0	0	2	1	1	1	20000	0	20000	1	12000	0	0	0	20	0	2	150000	0	21600
3	0	47	2	48	1	0	1	0	6	3	1	0	250	0	1	0	1	1	30000	0	30000	1	20000	0	0	0	0	0	0	50000	0	43200
3	1	46	1	47	1	9	1	0	5	3	1	0.3	45	0	1	1	2	1	55000	0	55000	1	48000	0	0	0	0	0	45	56000	1	0
3	1	48	1	46	1	6	1	0	4	4	1	0	10	0	1	1	1	1	30000	0	30000	1	50000	0	0	40000	0	0	0	45000	1	0
3	1	61	1	48	1	6	1	0	3	2	1	0.3	0	100	1	1	2	1	55000	0	55000	1	30000	0	0	0	0	0	7	40000	1	0
3	0	61	1	70	1	0	1	0	9	2	1	1	30	0	1	0	2	1	36000	0	36000	1	36000	0	0	0	0	0	0	45000	0	0
3	0	84	2	55	1	0	1	0	4	2	1	1	1	0	1	0	2	1	108000	0	108000	1	50000	2000	0	0	300	0	10	120000	0	0
3	0	58	1	64	1	8	1	0	3	3	1	1	10	0	1	0	2	1	72000	3500	68500	1	25000	0	0	0	200	0	5	120000	0	0
3	0	41	1	53	1	0	1	0	3	1	1	0.3	10	0	2	1	2	1	30000	0	30000	1	20000	0	0	0	0	0	0	200000	0	0
3	0	78	2	78	0	0	1	0	3	2	1	1	1	0	0	0	1	1	36000	0	36000	1	30000	0	0	4500	0	0	0	20000	1	0
3	0	41	1	42	1	8	1	0	5	3	1	1	10	0	1	0	2	0	25000	0	25000	1	25000	2000	0	4000	300	0	14	50000	0	0
3	0	72	1	83	1	0	1	0	5	2	1	0	10	0	1	0	2	1	84000	6000	78000	1	45000	2000		20000	200	0	12	56000	0	0
3	1	41	1	41	1	9	1	0	6	4	1	2	20	70	2	1	4	1	40000	10000	30000	1	40000	30000	0	10000	100	0	3	200000	1	30000
3	1	68	1	68	1	3	0	0	7	3	1	2	1	100	1	0	3	1	180000	0	180000	1	8400	0	0	0	15	0	5	220000	1	0
3	1	16	0	50	1	6	1	1	4	3	1	0	0	0	2	1	2	1	36000	0	36000	1	12000	0	0	36000	0	0	0	200000	1	0
3	0	45	1	48	1	9	1	0	5	3	1	2	20	0	2	1	3	1	20000	0	20000	1	15000	0	0	0	0	0	0	200000	0	0
3	1	69	1	69	1	0	0	0	5	1	1	0	0	0	1	0	2	1	36000	0	36000	1	12000	0	0	0	0	0	0	60000	1	0
3	1	63	2	63	1	6	1	0	4	4	1	1	3	0	1	0	2	1	10000	10000	0	0	12000	0	0	0	0	0	8	60000	1	0
3	1	68	1	68	1	1	1	0	4	4	1	2	7	0	1	0	2	0	24000	0	24000	1	2920	0	0	0	0	0	6	60000	1	0
3	0	49	1	61	1	2	1	0	4	3	1	4	20	0	1	0	2	1	12000	0	12000	1	12000	0	0	0	0	0	4	60000	0	0
3	1	56	1	56	1	3	1	0	2	2	1	0.2	5	0	1	0	0	0	36000	0	36000	1	10000	0	0	0	0	0	0	40000	1	0
3	1	45	1	45	1	9	1	0	3	3	1	0.5	10	0	1	0	0	1	130000	400	129600	1	12000	0	0	8000	0	0	0	50000	1	0
3	1	78	1	78	1	6	1	0	13	10	1	1	10	100	1	0	6	1	100000	0	100000	1	14400	0	0	0	0	0	3	300000	1	550
3	0	57	1	65	1	0	1	0	3	1	1	1	10	100	0	0	1	1	24000	0	24000	1	12000	0	0	0	10	0	2	100000	0	4200
3	1	63	1	63	1	7	1	0	2	2	1	3	10	100	0	0	0	0	20000	0	20000	1	10000	0	0	0	10	0	2	100000	1	3600
3	0	77	1	77	0	0	1	0	3	2	1	2	30	100	0	0	2	1	25000	0	25000	1	20000	0	0	0	10	0	0	200000	1	0
3	1	48	1	48	1	5	0	0	5	4	1	2	3	0	2	1	1	0	50000	3400	46600	1	40000	3500	0	35000	0	0	0	200000	1	0
3	1	70	1	70	1	5	0	1	5	5	1	2	3	0	0	0	4	1	84000	100	83900	1	20000	0	0	0	0	0	0	30000	1	0
3	1	53	1	51	1	8	1	0	6	4	1	3	12	66	0	0	2	1	30000	1000	29000	1	13000	1000	0	0	0	0	0	20000	1	0
3	1	51	1	60	1	6	1	0	5	3	1	6	3	0	1	0	3	1	15000	0	15000	1	15000	0	0	6000	0	0	0	50000	1	0
3	1	60	1	51	1	8	1	0	5	5	1	1	10	0	1	0	3	1	20000	0	20000	1	20000	0	0	0	0	0	0	50000	1	0
3	0	98	1	77	1	0	1	0	3	3	1	1	0	100	2	1	2	0	20000	0	20000	1	20000	0	0	0	0	0	0	200000	0	0
3	0	77	2	66	0	6	1	0	1	0	1	0.5	0	0	0	0	0	0	0	0	0	0	1200	0	0	0	0	0	0	20000	1	0
3	1	66	1	78	1	8	1	0	2	2	1	0.5	0	0	0	0	1	0	12000	0	12000	1	10000	0	0	0	0	0	0	30000	1	0
3	1	78	1	64	1	5	1	0	5	5	1	2	15	100	0	0	3	1	180000	1000	179000	1	150000	1200	30000	130000	100	0	4	240000	1	600
3	1	64	0	50	1	11	1	0	6	2	1	3	5	0	1	0	2	1	72000	0	72000	1	15000	50	0	3000	200	0	5	50000	1	0
3	0	50	1	38	1	0	1	0	4	4	1	2	5	0	0	0	2	1	60000	0	60000	1	52000	0	0	40000	20	0	2	60000	0	0
3	1	38	1	80	1	0	1	0	4	3	1	1	10	100	2	1	1	1	100000	0	100000	1	70000	40000	30000	40000	20	0	0	200000	1	0
3	1	80	1	83	1	0	1	0	3	2	1	1	20	100	2	1	1	1	130000	0	130000	1	10000	0	0	0	15	0	3	200000	1	7200
3	0	83	2	53	0	8	1	0	3	2	1	4.8	1	0	1	0	1	1	20000	0	20000	1	0	0	0	0	20	0	0	60000	1	0
3	0	53	1	47	0	8	1	0	4	4	1	2.5	15	100	1	0	3	1	48000	0	48000	1	20000	0	2000	0	8	0	0	400000	1	2400
3	1	47	1	63	1	8	1	0	3	3	1	1.5	15	100	2	1	2	0	15000	0	15000	1	20000	0	0	0	5	0	0	200000	1	0
3	1	63	1	55	1	8	1	0	3	3	1	2	2	0	0	0	1	0	20000	0	20000	1	5000	1000	0	0	20	0	0	20000	1	1800
3	0	53	1	55	1	8	1	0	3	3	1	2	0	100	0	0	1	0	5000	5000	0	0	10000	1000	0	0	5	0	0	10000	0	1800
3	1	65	1	65	1	5	1	0	3	3	1	2	0	100	0	0	1	0	30000	0	30000	1	30000	0	0	0	5	2	0	20000	1	0
3	1	66	1	42	1	8	1	0	6	2	1	1	1	0	2	1	1	1	48000	0	48000	1	15000	100	0	5000	20	0	6	200000	1	0
3	0	54	1	60	1	5	1	0	4	3	1	2	0	100	0	0	0	0	30000	500	29500	1	4000	1000	0	60000	200	0	0	150000	0	800
3	0	75	1	50	1	8	1	0	4	4	1	1	0	100	1	0	2	0	12000	2000	10000	1	10000	500	0	0	5	0	0	100000	0	7200
3	1	56	1	56	1	4	1	0	1	0	1	2	0	0	1	0	0	0	20000	0	20000	1	10000	0	0	0	50	0	0	60000	1	800
3	0	40	1	66	1	5	1	0	6	6	1	1	0	0	1	0	1	1	110000	0	110000	1	160000	0	0	150000	0	0	0	60000	0	500
3	0	52	1	55	1	9	1	0	4	4	1	1	0	0	2	1	1	1	91000	200	90800	1	60000	0	0	150000	5	0	0	200000	0	0
3	0	71	1	80	1	6	1	0	7	4	1	2	6	100	1	0	4	1	260000	0	260000	1	100000	0	700	0	5	0	10	400000	0	0
3	1	56	2	56	1	0	1	0	5	1	1	1	0	100	0	0	2	1	50000	0	50000	1	40000	0	0	0	10	0	0	30000	1	1200
3	0	73	1	82	1	0	1	0	2	0	1	1	0	100	0	0	0	0	2400	0	2400	1	8500	0	0	0	10	0	2	50000	0	550
3	0	74	1	77	1	9	1	0	2	1	1	1.5	0	100	1	0	3	1	20000	300	19700	1	7000	0	0	0	35	0	0	50000	0	550
3	1	51	1	51	1	9	1	0	4	4	1	1	16	0	2	1	4	1	130000	3000	127000	1	80000	3000	10000	0	0	0	0	200000	1	0
3	0	60	1	62	1	2	1	0	2	0	1	2	3	0	1	0	0	0	2280	0	2280	1	10950	0	0	0	0	1	4	40000	0	0
3	1	50	1	50	1	0	1	0	4	2	1	1.3	30	0	1	0	3	1	45000	3000	42000	1	20000	0	1400	6000	0	0	0	40000	1	450
3	0	56	1	66	1	4	1	0	3	0	1	3	1	0	1	0	0	0	0	0	0	0	10000	0	0	0	0	0	0	40000	0	36500
3	1	46	1	41	1	5	1	0	3	3	1	0.3	10	0	2	1	2	0	30000	0	30000	1	30000	0	0	150000	0	0	0	200000	1	0
3	1	51	1	51	1	9	1	0	3	3	1	2	72	0	1	0	3	0	70000	10000	60000	1	70000	8000	8000	0	0	0	7	60000	1	0
3	0	63	1	65	1	5	1	0	2	2	1	2	0.5	0	0	0	0	1	3000	0	3000	1	10000	0	0	0	0	0	5	20000	0	10000
3	0	62	1	69	1	5	1	0	5	5	1	0	0	0	0	0	0	0	10000	0	10000	1	5000	0	0	3000	15	0	7	20000	0	0
3	1	60	1	60	1	5	1	0	3	3	1	1	50	100	0	0	2	1	20000	500	19500	1	10000	2000	0	0	10	0	0	30000	1	21600
3	1	70	1	70	1	0	1	0	5	4	1	0	3	0	2	1	1	0	20000	0	20000	1	20000	0	0	8000	20	0	7	200000	1	36000
3	1	49	1	49	1	8	1	0	3	3	1	1	1	10	1	0	2	0	10000	0	10000	1	10000	1500	0	0	0	0	0	60000	1	16200
3	1	65	1	65	1	5	1	0	2	2	1	0.38	100	100	0	0	0	0	15000	0	15000	1	10000	0	0	0	20	0	0	200000	1	14400
3	1	65	1	65	1	5	1	0	4	4	1	3	0	100	2	1	2	1	1000000	200	999800	1	500000	0	0	0	5	0	20	110000	1	0
3	1	60	1	60	1	5	1	0	6	4	1	2	0	100	2	1	4	0	10000	0	10000	1	10000	300	0	0	3000	0	0	400000	1	21600
3	1	69	1	69	1	5	1	1	8	6	1	3	2	100	0	0	4	1	40000	0	40000	1	5000	1000	0	0	3000	0	0	40000	1	1800
3	1	62	1	62	1	5	1	0	3	3	1	2	2	100	0	0	3	0	20000	400	19600	1	5000	50	0	0	3000	0	0	30000	1	0
3	1	53	1	53	1	5	1	0	4	4	1	0.5	2	0	0	0	1	0	10000	600	9400	1	10000	0	0	0	3000	0	0	20000	1	0
3	1	45	1	45	1	5	1	1	3	3	1	2	20	0	2	1	2	0	10000	0	10000	1	10000	0	0	0	0	0	0	130000	1	18000
3	1	57	1	57	1	5	1	0	4	4	1	0	40	0	0	0	2	0	5000	0	5000	1	5000	0	0	0	20	0	4	30000	1	21600
4	0	58	1	58	0	2	1	0	6	5	1	2.2	0	20	2	1	5	1	1500500	500	1500000	1	70000	0	0	0	400	0	6	900000	1	30000
4	1	57	1	57	1	7	1	0	6	5	1	3	30	0	2	1	2	1	20000	3500	7200	1	15000	0	0	20000	1000	0	16	300000	1	72000
4	0	49	1	56	1	0	1	0	3	2	1	0.5	2.5	100	1	0	1	1	30000	0	30000	1	12000	0	0	0	0	1	10	50000	0	0
4	0	67	1	70	1	5	1	0	2	2	1	2	2	80	2	1	0	0	24000	0	0	1	1500	1500	0	0	0	0	10	200000	0	0
4	0	63	1	66	1	0	1	0	5	5	1	2.5	2	100	0	0	2	1	30000	0	2500	1	0	0	0	0	0	0	12	35000	0	0
4	0	41	1	47	1	5	1	0	5	5	1	2	2	100	0	0	1	1	31000	0	31000	1	15000	0	0	15000	0	1	12	35000	0	0
4	1	56	1	56	1	0	1	0	3	1	1	1	2.5	100	1	0	1	1	25000	500	24500	1	13000	3000	0	0	200	1	10	80000	1	0
4	0	34	1	41	1	9	1	0	4	2	0	0.5	1.5	100	0	0	1	1	30000	0	18000	1	20000	3500	0	2500	50	0	10	50000	0	19200
4	0	80	1	79	1	0	1	0	6	4	1	2	0	0	1	0	3	1	100000	0	0	1	15000	0	0	2500	100	0	11	100000	0	28800
4	0	63	1	69	1	6	1	0	4	3	1	2	1	100	1	0	1	0	36000	0	0	1	30000	0	0	400	300	0	2	50000	0	0
4	1	60	2	60	1	0	1	0	1	0	1	0.3	0.1	0	1	0	0	0	24000	0	0	1	15000	0	0	0	50	0	4	40000	1	6000
4	0	66	1	77	1	0	1	0	2	0	0	2	2	100	1	0	0	0	2400	0	0	1	1200	0	0	0	0	0	16	50000	0	0
4	1	79	1	79	1	0	1	0	2	0	0	2.5	2.5	0	0	0	0	0	24000	0	2400	1	3600	0	0	0	0	0	2	35000	1	0
4	1	62	2	62	1	6	0	0	2	2	1	2.6	1.5	100	0	0	2	1	48000	4000	48000	1	6000	100	0	0	0	0	2	35000	1	0
4	1	75	1	75	1	5	1	0	5	5	1	0.1	0.25	0	1	0	1	1	50000	0	60000	1	6000	0	0	15000	0	0	17	50000	1	0
4	1	62	1	62	1	6	1	0	4	4	1	1	0.15	100	1	0	2	1	56000	20000	66000	1	15000	0	0	0	0	0	5	50000	1	0
4	0	67	1	72	1	6	1	0	2	1	1	1	1	100	1	0	0	0	25000	0	0	1	2400	0	0	0	0	0	21	50000	0	0
4	1	58	1	58	1	0	1	0	3	0	0	1.5	1.5	100	1	0	1	0	20000	0	20000	0	20000	1500	0	0	0	0	7	50000	1	0
4	1	67	1	67	1	5	1	0	3	2	1	2	2	100	1	0	0	1	30000	3000	0	1	1000	1000	0	0	0	0	5	50000	1	0
4	1	41	1	41	1	0	1	0	3	0	1	2.5	2.5	100	1	0	2	1	40000	0	40000	1	30000	0	0	1000	0	0	0	50000	1	7200
4	1	68	1	68	1	5	1	0	2	1	1	2	10	100	1	0	1	0	10000	6000	40000	1	10000	20000	0	0	0	0	10	50000	1	4800
4	1	54	1	54	1	11	1	0	5	4	1	2	40	100	2	1	4	1	60000	10000	0	1	12000	2000	0	10000	30	0	13	200000	1	4500
4	1	57	1	57	1	11	1	0	2	0	1	2.1	30	0	2	1	2	1	10000	3000	0	1	0	0	0	0	20	0	16	200000	1	5000
4	1	43	1	43	1	8	1	0	5	3	1	3	7	100	2	1	2	1	40000	7500	0	1	30000	0	0	15000	0	0	11	200000	1	30000
4	0	31	1	32	1	8	1	0	4	2	1	4.5	2	100	0	0	2	1	50000	3000	0	1	30000	1000	0	4000	30	0	15	35000	0	10000
4	1	51	1	51	1	12	1	0	3	3	1	0.6	0	100	1	0	0	0	12000	12000	0	0	10000	700	0	4640	100	0	15	100000	1	14400
4	0	49	1	58	1	8	1	1	4	3	1	3	0	100	1	0	1	1	6000	3000	3000	0	20000	3000	0	0	300	0	15	80000	0	38400
4	0	69	1	71	1	5	1	0	2	2	1	3	0	100	1	0	0	0	3000	3000	0	0	10000	500	500	0	300	0	7	100000	0	14400
4	0	50	1	54	1	6	1	1	5	4	1	1	0	100	2	1	2	1	36000	0	36000	1	24000	0	0	0	10	0	6	200000	0	6000
4	1	84	1	84	1	5	1	0	2	1	1	1.2	1.2	0	1	0	0	0	2000	2000	0	0	2000	0	0	0	30	0	7	80000	1	2000
4	0	33	1	51	1	8	1	0	3	3	1	0	0	0	1	0	2	1	54000	0	25000	1	25000	0	0	4500	100	2	12	50000	0	4000
4	0	63	1	73	1	0	1	0	5	2	1	1.2	7.8	0	1	0	2	1	72000	0	60000	1	72000	0	0	35000	100	0	0	50000	0	0
4	0	50	1	53	1	8	1	0	3	3	1	5	20	0	1	0	0	0	35000	7800	25000	0	25000	750	0	20000	200	0	10	50000	0	5000
4	0	77	1	57	1	5	1	0	4	2	1	0	0	0	2	1	2	1	66000	6000	65000	1	25000	0	0	0	30	6	0	200000	0	0
4	0	68	1	68	1	0	1	0	2	0	0	2	1	10	1	0	2	1	2500	2400	2400	0	1200	0	0	0	50	0	0	50000	0	2400
4	1	57	0	57	1	0	1	0	1	1	1	0	5.5	0	0	0	1	0	12000	1000	12000	0	12000	0	0	0	50	0	0	35000	1	0
4	1	71	1	71	1	3	0	0	8	8	1	1	5.5	0	0	0	4	1	170000	350	169650	1	90000	2000	0	10000	200	0	13	50000	1	28000
4	1	46	1	46	1	5	1	1	4	3	1	0.19	85	0	2	1	2	1	55000	34000	21000	1	20000	0	0	8000	180	0	10	210000	1	24000
4	0	68	1	79	1	5	1	1	2	1	1	2	10	20	0	0	1	0	8000	2000	6000	1	10000	1000	0	0	0	0	12	40000	0	14400
4	1	78	1	78	1	6	1	0	3	2	1	2	0	0	1	0	1	0	15000	2000	13000	1	1200	1000	0	0	0	0	10	50000	1	21600
4	1	50	1	50	1	6	0	0	4	4	1	2	80	50	1	1	1	1	25000	25000	0	0	10000	3500	0	0	0	0	7	50000	1	20000
4	1	58	1	58	1	5	1	0	2	2	1	2	40	0	0	0	1	1	60000	10000	50000	1	50000	500	2800	0	300	0	0	120000	1	10000
4	1	67	1	67	1	5	1	0	2	1	1	1.2	80	50	0	0	0	0	3000	0	3000	1	3000	800	0	0	200	0	7	15000	1	9600
4	0	36	1	63	1	0	1	0	4	1	1	1.2	80	100	0	0	0	0	30000	6000	24000	1	20000	500	0	15000	200	0	15	30000	0	19200
4	1	75	1	75	1	4	1	0	4	4	1	3	80	0	1	1	2	1	30000	0	30000	1	20000	1000	0	0	0	0	5	50000	1	24000
4	1	74	1	74	1	6	1	0	5	5	1	2.5	90	0	2	1	2	1	53600	0	53600	1	10000	0	0	10000	0	0	9	200000	1	0
4	0	82	1	85	1	0	1	0	2	0	1	2	100	50	1	1	1	0	51600	0	51600	1	2400	0	0	0	0	0	0	50000	0	1500
4	0	59	1	67	1	6	1	0	5	4	1	2	90	80	1	1	3	1	50000	0	50000	1	20000	1000	0	0	0	0	10	50000	0	0
4	0	68	1	73	1	5	1	0	5	5	1	1	50	50	1	1	3	1	130000	0	130000	1	20000	1000	0	5000	0	0	15	50000	0	0
4	1	78	1	78	1	4	0	0	2	1	1	3	100	50	1	0	1	0	8400	0	8400	1	5000	500	0	0	0	0	5	50000	1	1000
4	0	75	1	77	1	6	1	0	6	4	1	2	1.5	0	1	0	4	1	60000	0	60000	1	50000	100	0	10000	10	0	10	20000	0	43200
4	0	42	1	48	1	9	1	0	4	4	1	5	2.5	0	2	1	2	1	75000	25000	50000	1	45000	10000	0	17000	30	0	30	150000	0	38400
4	1	62	1	62	1	6	1	0	5	3	1	2.5	0	100	1	0	3	1	80000	0	80000	1	30000	0	0	10000	10	0	10	150000	1	48000
4	1	50	1	50	1	9	1	0	4	3	1	0	3	0	1	0	3	1	80000	0	80000	1	50000	500	0	0	50	0	0	100000	1	0
4	1	62	1	62	1	3	1	0	5	2	1	3.5	1	100	1	0	3	1	40000	0	40000	1	30000	650	0	20000	15	0	5	100000	1	36000
4	1	56	1	56	1	8	1	0	5	3	1	1.4	40	100	2	0	2	1	112000	0	112000	1	112000	500	0	0	200	0	0	300000	1	14400
4	0	47	1	46	1	5	1	0	4	3	1	1.2	80	0	0	0	1	1	20000	5000	15000	1	20000	2000	0	70000	100	0	3	35000	0	24000
4	1	57	1	57	1	12	1	1	3	3	1	1	30	100	0	0	1	1	13000	13000	0	0	24000	4000	0	20000	500	0	0	50000	1	18000
4	1	50	1	50	1	10	1	0	3	2	1	1	3	0	2	0	1	1	60000	1000	59000	1	20000	4000	0	8000	2000	0	0	200000	1	21600
4	0	16	0	52	1	8	1	0	4	4	1	0	0	0	2	1	3	1	20000	1000	19000	1	10000	0	0	2500	100	0	5	200000	0	1000
4	1	58	1	58	1	11	1	0	3	3	1	1	100	0	2	1	2	1	48400	11000	37400	1	40000	800	1000	50000	200	0	5	150000	1	6000
4	1	51	1	51	1	8	1	1	3	3	1	1.5	10	100	1	0	1	1	17000	1000	16000	1	5000	400	0	150000	200	0	19	250000	1	800
4	1	46	1	46	1	8	1	0	3	2	1	0.2	20	50	1	0	1	1	3300	1500	1800	1	3000	1000	0	18000	30	0	10	150000	1	300
4	0	52	1	55	1	11	1	0	3	3	1	0.5	0	100	0	0	0	0	18000	8000	10000	1	26000	1500	0	16000	500	0	5	45000	0	500
4	0	55	1	58	1	5	1	0	5	4	1	5	0	0	0	0	2	0	120000	0	120000	1	90000	0	0	0	100	0	0	50000	0	48000
4	1	68	1	68	1	6	1	0	4	4	1	2	2.5	100	1	0	4	0	30000	0	30000	1	24000	0	0	0	0	1	10	50000	1	0
4	1	53	1	53	1	9	1	0	6	6	1	1	2.5	100	1	0	3	1	45000	0	45000	0	36000	0	0	0	0	4	7	40000	1	0
4	1	61	1	62	1	2	1	0	6	5	1	1	1	100	1	0	2	1	20000	0	20000	0	12000	0	0	0	0	0	20	40000	1	0
4	0	59	1	68	1	5	1	0	5	2	1	0.25	5	100	1	0	2	1	36000	0	36000	1	48000	1000	0	0	0	0	18	40000	0	0
4	0	64	1	67	1	0	1	1	6	6	1	3	1	0	2	1	3	1	30000	0	30000	1	1000	0	0	3000	5	0	10	300000	0	5500
4	1	65	1	68	1	1	1	0	7	5	1	3.5	1	0	0	0	1	1	36000	0	36000	1	20000	0	0	0	0	0	2	20000	1	0
4	1	68	2	52	1	8	1	0	2	2	1	1	1	100	2	1	3	0	36000	1000	35000	1	30000	0	0	0	0	0	0	200000	1	0
4	0	52	1	64	1	12	1	0	3	3	1	1	6.5	0	2	1	2	1	24000	0	24000	1	24000	0	0	0	0	0	0	200000	1	0
4	1	64	1	77	1	0	1	0	5	4	1	1	2	0	1	0	8	1	110000	0	110000	1	80000	0	0	0	0	0	20	100000	1	1800
4	0	75	1	60	1	0	1	0	12	8	0	15	15	50	1	0	2	1	150000	0	150000	1	70000	1000	0	30000	100	0	0	180000	1	0
4	0	58	1	48	1	9	1	0	5	3	1	10	2	50	1	0	2	1	30000	500	29500	1	20000	1000	0	8000	50	0	0	10000	1	2000
4	1	48	1	45	1	6	1	0	5	3	1	1	15.5	100	1	0	1	1	48000	0	48000	1	40000	0	0	24000	30	0	5	40000	1	36000
4	1	45	1	70	1	6	1	0	4	2	1	1	0	100	1	0	1	1	30000	0	30000	0	20000	0	0	7200	40	0	0	40000	1	28800
4	1	70	2	67	1	6	1	0	1	1	1	1	0	0	1	0	0	1	48000	0	48000	1	20000	0	0	0	40	0	8	40000	1	8400
4	1	67	1	66	1	8	1	0	2	1	1	0.1	3.3	0	0	0	2	0	78000	8000	70000	1	5600	0	0	0	100	0	5	50000	1	4000
4	1	66	1	47	1	5	1	0	6	3	1	3	12	100	2	1	1	1	120000	10800	109200	1	20000	0	0	0	0	0	13	200000	0	36000
4	1	47	1	65	1	8	1	0	5	2	1	2	8.5	100	1	0	0	1	40000	0	40000	1	25000	1750	0	20000	30	0	32	40000	1	0
4	1	65	1	42	1	11	1	0	2	2	1	2	3.5	0	0	0	1	0	67000	6700	60300	1	40000	600	0	0	50	0	0	20000	1	0
4	0	68	2	46	1	6	1	0	5	3	1	0.2	2	0	0	0	1	1	30000	0	30000	0	15000	500	0	0	300	0	3	20000	0	0
4	1	46	0	68	1	2	1	0	1	1	1	1	0	100	1	0	1	1	29200	0	29200	1	10800	0	0	0	0	0	0	40000	1	0
4	1	68	1	30	1	14	1	0	6	2	1	3	0	100	2	1	1	1	120000	0	120000	1	100000	0	0	20000	20	0	0	220000	1	0
4	1	30	1	68	1	5	0	0	2	2	1	0	0	0	2	1	1	1	80000	0	80000	1	60000	0	0	0	200	0	0	220000	1	0
4	1	68	2	49	1	9	1	0	1	1	1	0.5	0.5	0	0	0	0	0	1000	0	1000	1	16800	0	0	0	0	0	0	20000	1	0
4	0	49	1	53	1	8	1	0	5	3	1	0.5	2.5	100	0	0	1	1	36000	0	36000	1	18000	0	0	0	0	0	4	20000	0	0
